# Supplementary material
Source: Springer Nature journal article supplement (https://www.springermedizin.de/resource/supplementary/12936_2012_2561_MOESM8_ESM.pdf/9543182)

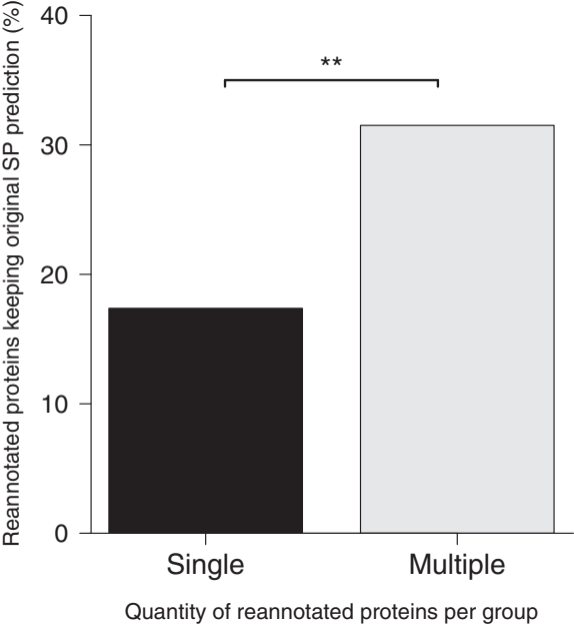

Supplement: MOESM8 [file 9543182]
